# Supplementary material for: Do exercise-based prevention programmes reduce non-contact musculoskeletal injuries in football (soccer)? A systematic review and meta-analysis with 13 355 athletes and more than 1 million exposure hours
Source: HighWire-hosted journal article supplement (doi:10.1136/bjsports-2020-103683), 2021-05-17
Supplement: bjsports-2020-103683supp002_data_supplement.pdf [file bjsports-2020-103683supp002_data_supplement.pdf]

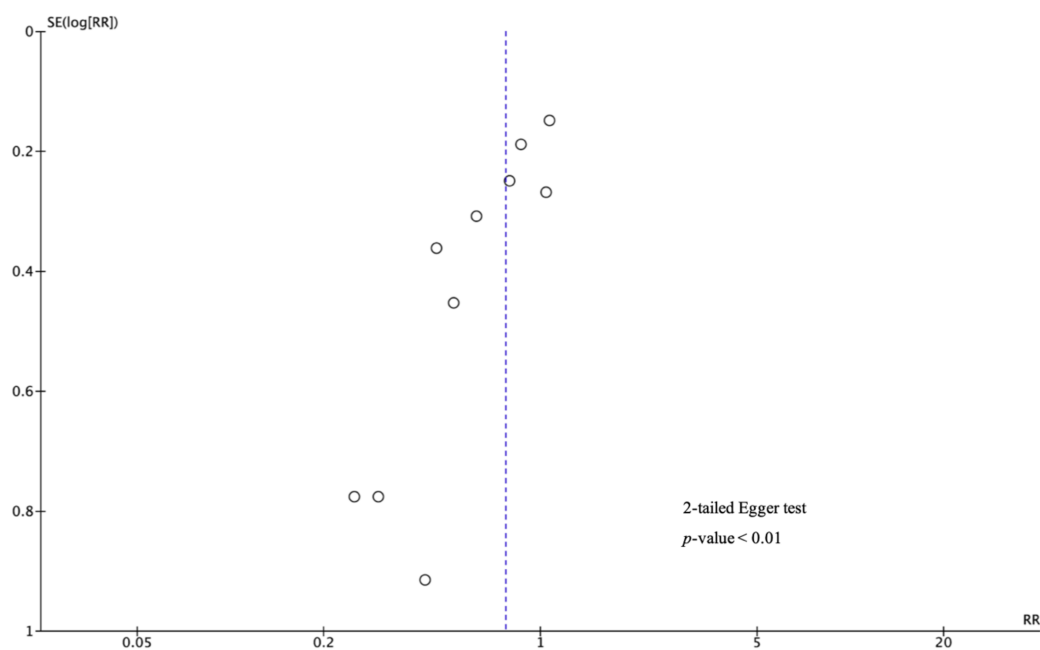

**Supplementary Figure 1.** Funnel plot and 2-tailed Egger test analysis of the effects of exercise-based prevention programs in the prevention of non-contact injuries among football players.

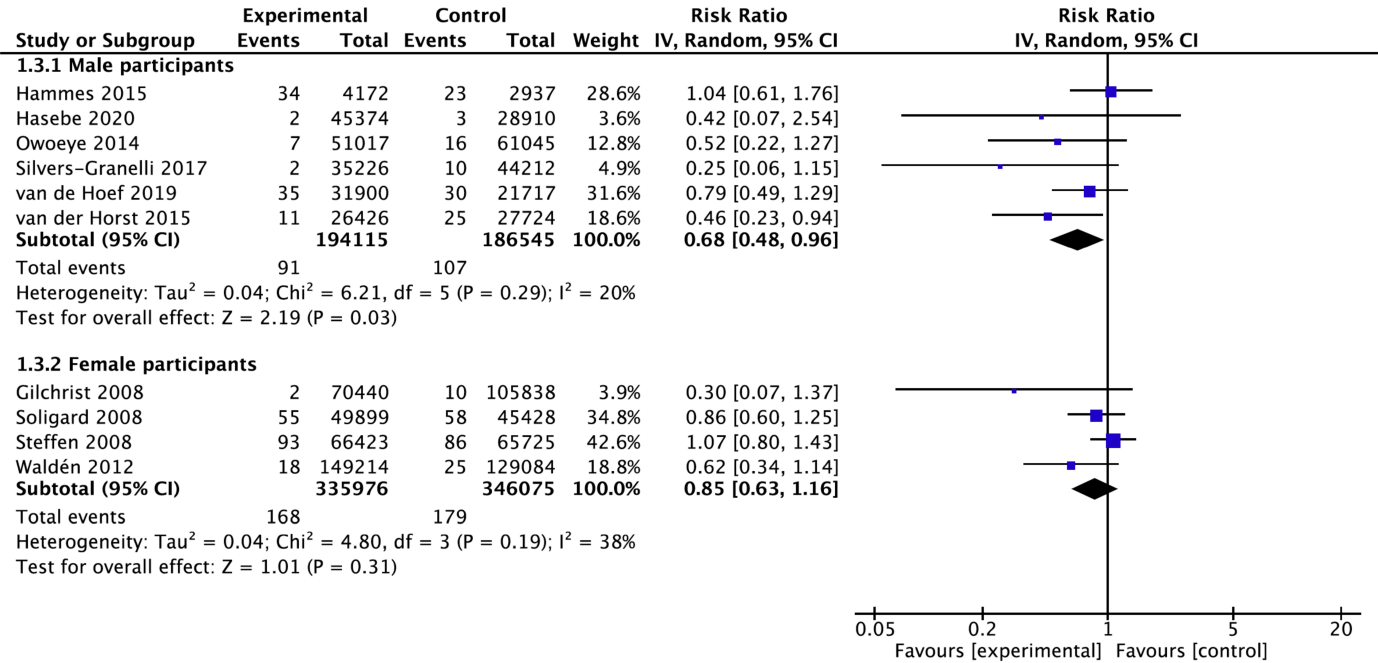

**Supplementary Figure 2.** Meta-analysis investigating the effect of exercise-based prevention programs compared to a control group in reducing non-contact injuries according to sex. The size of the blue boxes is proportional to the weight of each study in the analysis.

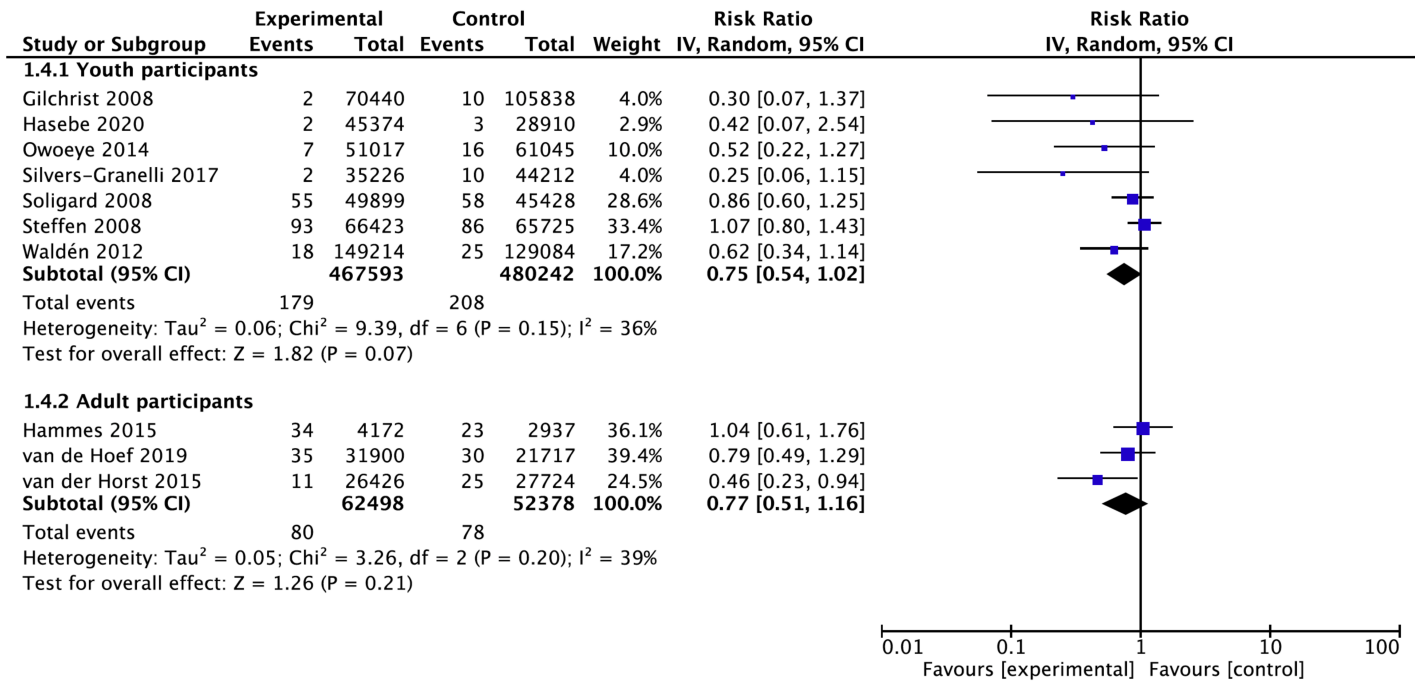

**Supplementary Figure 3.** Meta-analysis investigating the effect of exercise-based prevention programs compared to a control group in reducing non-contact injuries according to age (youth and adults). The size of the blue boxes is proportional to the weight of each study in the analysis.
